# Supplementary material
Source: PubMed Central journal article supplement (PMC3264231)

Yokoyama et al.

supplementary fig. 1

Inhibitory activities of a) GAT, b) MXF and c) SIT on supercoiling activities against *M. leprae* WT and mutant DNA gyrases. Relaxed pBR322 DNA (0.3 mg) was incubated with 50 ng WT and mutant GyrA and 50 ng WT GyrB in the absence or presence of the indicated concentration (in mg/ml) of three quinolones. The reactions were stopped, and the DNA products were analyzed by electrophoresis in 1% agarose gel. R and SC denote Relaxed and supercoiled pBR322 DNA, respectively.

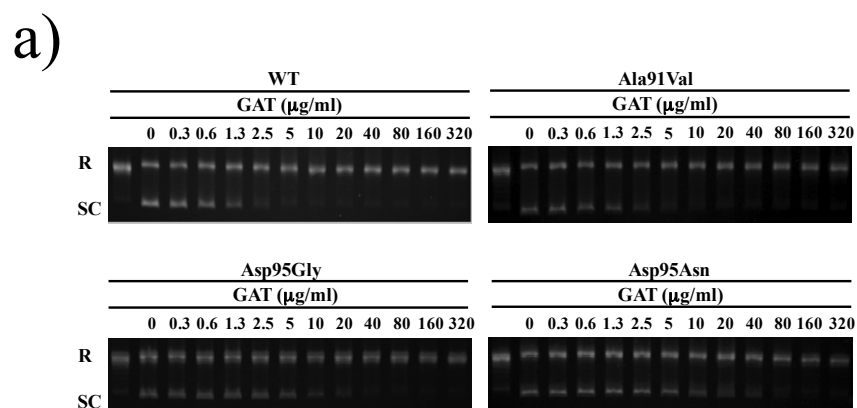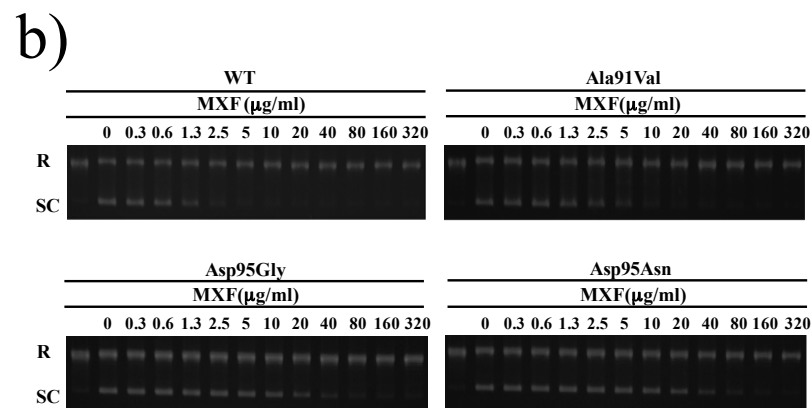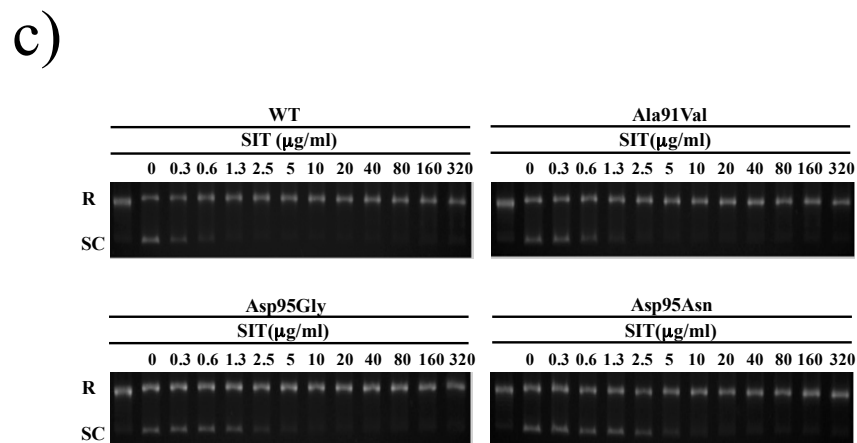

Yokoyama et al.

Supplemental Fig. 2.

DNA cleavage activity of a) GAT, b) MXF and c) SIT against *M. leprae* WT and mutant DNA gyrases. Supercoiled pBR322 DNA (0.3 mg) was incubated with 50 ng each of WT and mutant GyrA and 50 ng WT GyrB in the absence or presence of the indicated concentration (in mg/ml) of three quinolones. The reactions were stopped, and the processed DNA products were analyzed by electrophoresis in 1% agarose gel. R, L and SC denote relaxed, linear and supercoiled pBR322 DNA, respectively.

a)

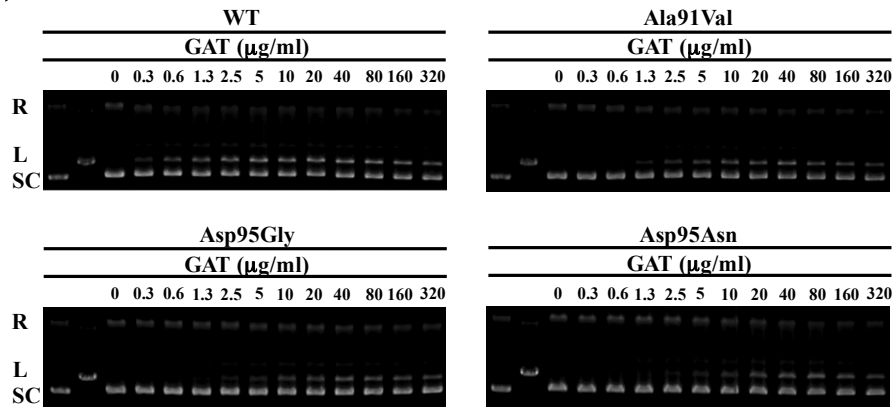

b)

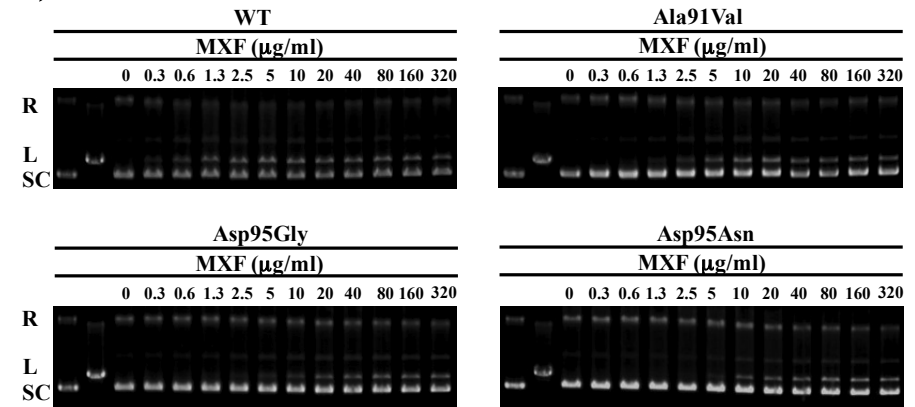

c)

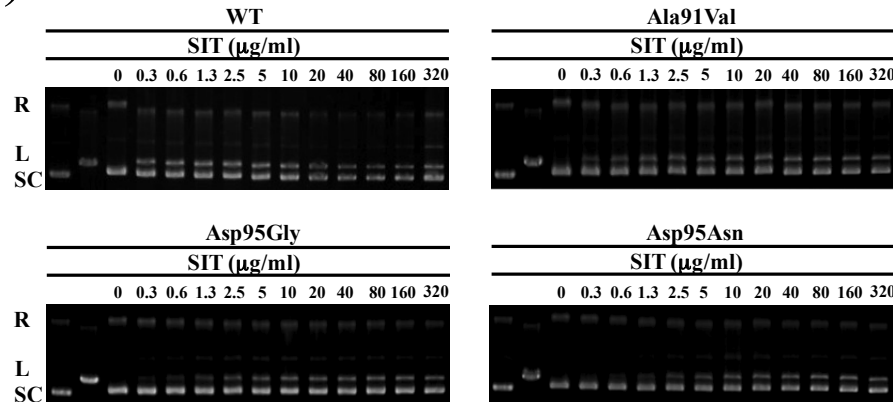

Supplement: supp_56.2.697_FigS1-S2.pdf [file supp_56.2.697_FigS1-S2.pdf]
